# Supplementary material for: Characterization of the Complete Mitochondrial Genome of Leucoma salicis (Lepidoptera: Lymantriidae) and Comparison with Other Lepidopteran Insects
Source: PubMed Central journal article supplement (PMC5156926; doi:10.1038/srep39153), 2016-12-15
Supplement: srep39153-s1.pdf [file srep39153-s1.pdf]

**Characterization of the Complete Mitochondrial Genome of *Leucoma salicis***

**(Lepidoptera: Lymantriidae) and Comparison with Other Lepidopteran Insects**

Yu-Xuan Sun<sup>1</sup>, Lei Wang<sup>1</sup>, Guo-Qing Wei<sup>1</sup>, Cen Qian<sup>1</sup>, Li-Shang Dai<sup>1</sup>, Yu Sun<sup>1</sup>,

Muhammad Nadeem Abbas<sup>1</sup>, Bao-Jian Zhu<sup>1</sup> and Chao-Liang Liu<sup>1\*</sup>

**Table S1.** The identities of entire mitogenomes from other members of Lymantriidae, with the *L. salicis* mitogenome.

| Superfamily | Family       | Species                          | Identity | GenBank No. |
|-------------|--------------|----------------------------------|----------|-------------|
| Noctuoidea  | Lymantriidae | <i>Leucoma salicis</i>           | 100%     | This study  |
|             |              | <i>Lachana alpherakii</i>        | 79%      | KJ957168.1  |
|             |              | <i>Gynaephora menyuanensis</i>   | 78%      | KC185412.1  |
|             |              | <i>Euproctis pseudoconspersa</i> | 78%      | KJ716847.1  |
|             |              | <i>Lymantria dispar</i>          | 77%      | GU994783.1  |
